# Supplementary material for: Cooled radiofrequency ablation versus standard medical management for chronic sacroiliac joint pain: a multicenter, randomized comparative effectiveness study
Source: PubMed Central journal article supplement — Reg Anesth Pain Med. 2023 Jul 5;49(3):184–91. doi: 10.1136/rapm-2023-104568 (PMC10958262; doi:10.1136/rapm-2023-104568), 2023-07-05
Supplement: rapm-2023-104568supp001.pdf [file rapm-2023-104568supp001.pdf]

**Supplemental Table 1.** Concurrent Hip or Back Procedures At 3 Months

| Concurrent Hip or Back Procedures<br>N (%) | 0 - 3 Months       |                          |
|--------------------------------------------|--------------------|--------------------------|
|                                            | CRFA               | SMM                      |
| <b>Sacroiliac Joint</b>                    | <b>3/105 (2.9)</b> | <b>22/105 (21.0)</b>     |
| Steroid Injection                          | 1/105 (1.0)        | 18/105 (17.1)            |
| Trigger Point Injection (TPI)              | 0/105 (0.0)        | 0/105 (0.0)              |
| Radiofrequency Ablation (RFA) <sup>1</sup> | 0/105 (0.0)        | 1/105 (1.0)              |
| Nerve Block                                | 0/105 (0.0)        | 1/105 (1.0)              |
| TENS                                       | 1/105 (1.0)        | 0/105 (0.0)              |
| Physical Therapy (PT)                      | 1/105 (1.0)        | 2/105 (1.9)              |
| Other                                      | 0/105 (0.0)        | 1/105 (1.0) <sup>2</sup> |
| <b>Hip<sup>3</sup></b>                     | <b>5/105 (4.8)</b> | <b>3/105 (2.9)</b>       |
| Steroid Injection                          | 4/105 (3.8)        | 3/105 (2.9)              |
| PRP Injection                              | 1/105 (1.0)        | 0/105 (0.0)              |
| Radiofrequency Ablation (RFA)              | 0/105 (0.0)        | 0/105 (0.0)              |
| Nerve Block                                | 0/105 (0.0)        | 0/105 (0.0)              |
| Surgery                                    | 0/105 (0.0)        | 0/105 (0.0)              |
| <b>Low Back/Lumbar</b>                     | <b>9/105 (8.6)</b> | <b>2/105 (1.9)</b>       |
| Steroid Injection                          | 4/105 (3.8)        | 1/105 (1.0)              |
| Trigger Point Injection (TPI)              | 0/105 (0.0)        | 1/105 (1.0)              |
| Radiofrequency Ablation (RFA)              | 1/105 (1.0)        | 0/105 (0.0)              |
| Nerve Block                                | 2/105 (1.9)        | 0/105 (0.0)              |
| Physical Therapy (PT)                      | 1/105 (1.0)        | 0/105 (0.0)              |
| Spinal Cord Stimulator Placement           | 0/105 (0.0)        | 0/105 (0.0)              |
| Fusion                                     | 0/105 (0.0)        | 0/105 (0.0)              |
| Botox Injection                            | 1/105 (1.0)        | 0/105 (0.0)              |
| Other                                      | 0/105 (0.0)        | 1/105 (1.0) <sup>4</sup> |
| <b>Buttocks</b>                            | <b>1/105 (1.0)</b> | <b>1/105 (1.0)</b>       |
| Steroid Injection                          | 0/105 (0.0)        | 1/105 (1.0)              |

| Concurrent Hip or Back Procedures<br>N (%) | 0 - 3 Months             |                    |
|--------------------------------------------|--------------------------|--------------------|
|                                            | CRFA                     | SMM                |
| Trigger Point Injection (TPI)              | 1/105 (1.0)              | 0/105 (0.0)        |
| <b>Coccyx/Sacrum</b>                       | <b>3/105 (2.9)</b>       | <b>0/105 (0.0)</b> |
| Steroid Injection                          | 2/105 (1.9)              | 0/105 (0.0)        |
| Other                                      | 1/105 (1.0) <sup>5</sup> | 0/105 (0.0)        |
| <b>Upper Back (Cervical, Thoracic)</b>     | <b>1/105 (1.0)</b>       | <b>0/105 (0.0)</b> |
| Trigger Point Injection (TPI)              | 0/105 (0.0)              | 0/105 (0.0)        |
| Nerve Block                                | 1/105 (1.0)              | 0/105 (0.0)        |
| Spinal Cord Stimulator Placement           | 0/105 (0.0)              | 0/105 (0.0)        |
| <b>Other</b>                               | <b>3/105 (2.9)</b>       | <b>0/105 (0.0)</b> |
| Trigger Point Injection (TPI)              | 1/105 (1.0)              | 0/105 (0.0)        |
| Nerve Block                                | 0/105 (0.0)              | 0/105 (0.0)        |
| Physical Therapy (PT)                      | 1/105 (1.0)              | 0/105 (0.0)        |
| Other                                      | 1/105 (1.0) <sup>4</sup> | 0/105 (0.0)        |

<sup>1</sup> protocol deviation

<sup>2</sup> chiropractic maneuvers

<sup>3</sup> for recurrence of active symptoms

<sup>4</sup> acupuncture

<sup>5</sup> dry needling

**Supplemental Table 2.** Primary Effectiveness Endpoint of Reduction in Numeric Rating Scale Pain Score at 3 Months by Age and Treatment Group - Complete Case Analysis

|                                                | Age <65 Years |             |                      | Age ≥65 Years |            |                     |
|------------------------------------------------|---------------|-------------|----------------------|---------------|------------|---------------------|
|                                                | CRFA          | SMM         | CRFA - SMM           | CRFA          | SMM        | CRFA - SMM          |
| N                                              | 59            | 70          | --                   | 27            | 22         | --                  |
| Mean                                           | 2.5           | 0.2         | --                   | 2.5           | 1.3        | --                  |
| SD                                             | 2.7           | 1.3         | --                   | 2.2           | 2.4        | --                  |
| Median                                         | 2.0           | 0.0         | --                   | 2.0           | 0.0        | --                  |
| Minimum                                        | -2.0          | -3.0        | --                   | -2.0          | -2.0       | --                  |
| Maximum                                        | 9.0           | 3.0         | --                   | 7.0           | 8.0        | --                  |
| 95% CI for the mean                            | (1.8, 3.2)    | (-0.1, 0.5) | --                   | (1.6, 3.4)    | (0.2, 2.4) | --                  |
| Difference between means (CRFA-SMM) and 95% CI | --            | --          | 2.4 (1.6, 3.1)       | --            | --         | 1.2 (-0.1, 2.5)     |
| P-value (difference between groups)            | --            | --          | <0.0001 <sup>2</sup> | --            | --         | 0.0355 <sup>2</sup> |

<sup>1</sup>Two-sided t-test for independent means<sup>2</sup>Two-sided Wilcoxon test for location
